# Supplementary material for: Alterations in Peripheral Lymphocyte Subsets under Immunochemotherapy in Stage IV SCLC Patients: Th17 Cells as Potential Early Predictive Biomarker for Response
Source: MDPI journal article supplement (doi:10.3390/ijms25105056), 2024-05-07
Supplement: s1 [file s1]

**Supplemental Figure S1.** Flowchart of therapy cycles and drop out

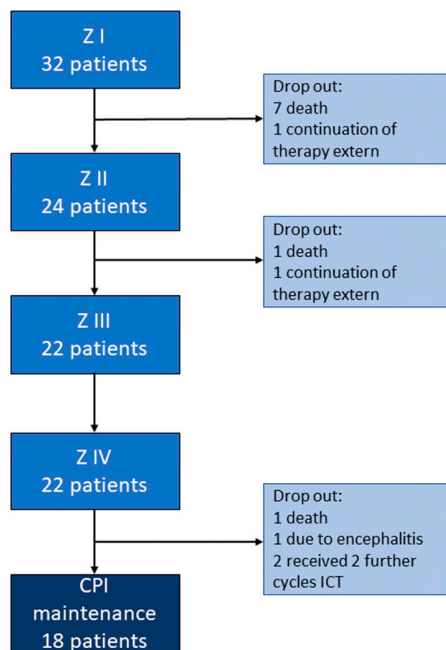

Figure legend: Patients were treated with immunochemotherapy (ICT) cycles (Z) I to IV (carboplatin, etoposide and atezolizimab), followed by maintenance with checkpoint inhibitor (CPI) atezolizumab mono. One patient developed encephalitis as a side effect of CPI.

**Supplemental Table S1.** Identification and gating strategy for detection of main lymphocyte types and their subsets using flow cytometry.

| Lymphocytes                                              | Immunophenotype   |
|----------------------------------------------------------|-------------------|
| <b>Total B lymphocytes (CD19+)</b>                       | <b>CD3- CD19+</b> |
| Naïve B cells                                            | IgD+ CD27-        |
| Transitional B cells                                     | CD24+ CD38+       |
| Non-class switched memory B cells                        | IgD+ CD27+        |
| Class switched memory B cells                            | IgD- CD27+        |
| <b>Total T lymphocytes (CD3+)</b>                        | <b>CD3+ CD19-</b> |
| <b>Natural killer-like T (NKT) cells (CD56+ T cells)</b> | <b>CD3+ CD56+</b> |
| <b>T helper lymphocytes (CD4+)</b>                       | <b>CD3+ CD4+</b>  |
| Naïve                                                    | CD62L+ CD45RA+    |
| Central memory                                           | CD62L+ CD45RA-    |
| Effector memory                                          | CD62L- CD45RA-    |
| Effector memory RA+ (EMRA)                               | CD62L- CD45RA+    |
| Early activated                                          | CD28+ CD27+       |
| Intermediate activated                                   | CD28- CD27+       |

|                                        |                                           |
|----------------------------------------|-------------------------------------------|
| Late activated                         | CD28- CD27-                               |
| High exhausted                         | CD279++ / CD279bright                     |
| Low exhausted                          | CD279+ / CD279dim                         |
| Terminal effector                      | CD279- CD57+                              |
| HLA DR+ (activated)                    | HLA-DR+                                   |
| CD69+ (activated)                      | CD69+                                     |
| Th1                                    | CXCR3+ CCR4- CCR5+ CCR6-                  |
| Th2                                    | CXCR3- CCR4+ CCR5- CCR6-                  |
| Th17                                   | CXCR3- CCR4+ CCR5- CCR6+                  |
| CD127 low regulatory                   | CD25+ CD127 low                           |
| Naive regulatory                       | CD45RA-                                   |
| memory reulatory                       | CD45RA+                                   |
| stem cell-like memory (tscm)           | CD27+ CD28+ CD45RA+vCD57-<br>CD62L+ CD95+ |
| <b>Cytotoxic lymphocytes (CD8+)</b>    | <b>CD3+ CD8+</b>                          |
| Naive                                  | CD62L+ CD45RA+                            |
| Central memory                         | CD62L+ CD45RA-                            |
| Effector memory                        | CD62L- CD45RA-                            |
| Effector memory RA+ (EMRA)             | CD62L- CD45RA+                            |
| Early activated                        | CD28+ CD27+                               |
| Intermediate activated                 | CD28- CD27+                               |
| Late activated                         | CD28- CD27-                               |
| High exhausted                         | CD279++ / CD279bright                     |
| Low exhausted                          | CD279+ / CD279dim                         |
| Terminal effector                      | CD279- CD57+                              |
| HLA-DR+ (activated)                    | HLA-DR+                                   |
| CD69+ (activated)                      | CD69+                                     |
| CD127 low regulatory                   | CD25+ CD127 low                           |
| Naive regulatory                       | CD45RA-                                   |
| memory reulatory                       | CD45RA+                                   |
| stem cell-like memory (tscm)           | CD27+ CD28+ CD45RA+vCD57-<br>CD62L+ CD95+ |
| <b>Natural killer lymphocytes (NK)</b> | <b>CD56+ CD3-</b>                         |
| CD56+/CD16+                            | CD56+/CD16+                               |
| CD56bright/CD16dim                     | CD56bright/CD16dim                        |
| CD56dim/CD16bright                     | CD56dim/CD16bright                        |

**Supplemental Table S2.** Information on antigens and fluorochrome-antibody conjugates

|                | Antigen          | Fluorochrome    | Clone     | Isotype             | Article no.<br>Beckmann<br>Coulter/<br>Biollegend |
|----------------|------------------|-----------------|-----------|---------------------|---------------------------------------------------|
| <b>Tube 01</b> | IgD              | FITC            | IA6-2     | Mouse IgG2a         | B30652                                            |
|                | CD27             | PE              | 1A4CD27   | Mouse IgG1          | B96790                                            |
|                | CD16             | ECD             | 3G8       | Mouse IgG1          | B49216                                            |
|                | CD56             | PC5.5           | N901      | Mouse IgG1          | B49189                                            |
|                | CD38             | PC7             | LS198-4-3 | Mouse IgG1          | B49198                                            |
|                | CD24             | APC             | ALB9      | Mouse IgG1          | A87785                                            |
|                | CD3              | APC-AF750       | UCHT1     | Mouse IgG1          | A94680                                            |
|                | CD19             | Pacific Blue    | J3-119    | Mouse IgG1          | B49213                                            |
|                | CD45             | Krome<br>Orange | J33       | Mouse IgG1          | B36294                                            |
| <b>Tube 02</b> | CD45RA           | FITC            | ALB11     | Mouse IgG1          | A07786                                            |
|                | CD95             | PE              | UB2       | Mouse IgG1          | IM1739                                            |
|                | CD62L            | ECD             | DREG56    | Mouse IgG1          | IM2713U                                           |
|                | CD279            | PC5.5           | PD1.3     | Mouse IgG2b         | B36123                                            |
|                | CD28             | PC7             | CD28.2    | Mouse IgG1          | B23313                                            |
|                | CD27             | APC             | 1A4CD27   | Mouse IgG1          | B09983                                            |
|                | CD8              | APC-AF700       | B9.11     | Mouse IgG1          | B49181                                            |
|                | CD3              | APC-AF750       | UCHT1     | Mouse IgG1          | A94680                                            |
|                | CD57             | Pacific Blue    | NC1       | Mouse IgM           | A74779                                            |
|                | CD4              | Krome<br>Orange | 13B8.2    | Mouse IgG1          | A96417                                            |
|                |                  |                 |           |                     |                                                   |
|                |                  |                 |           |                     |                                                   |
| <b>Tube 03</b> | CD45RA           | FITC            | ALB11     | Mouse IgG1          | A07786                                            |
|                | CD25             | PE              | B1.49.9   | Mouse IgG2a         | A07774                                            |
|                | CD69             | ECD             | TP1.55.3  | Mouse IgG2b         | 6607110                                           |
|                | CD127            | APC             | R34.34    | Mouse IgG1          | B42026                                            |
|                | CD8              | APC-AF700       | B9.11     | Mouse IgG1          | B49181                                            |
|                | HLA-DR           | Pacific Blue    | Immu-357  | IgG1                | B36291                                            |
|                | CD4              | Krome<br>Orange | 13B8.2    | Mouse IgG1          | A96417                                            |
|                |                  |                 |           |                     |                                                   |
| <b>Tube 04</b> | CD183<br>(CXCR3) | AF488           | G025H7    | Mouse IgG1          | B68144                                            |
|                | CD195 (CCR5)     | PE              | J418F1    | Rat IgG2b           | 359106                                            |
|                | CD196 (CCR6)     | PC7             | B-R35     | Mouse IgG2a         | B68132                                            |
|                | CD3              | APC-AF750       | UCHT1     | Mouse IgG1          | A94680                                            |
|                | CD194 (CCR4)     | BV421           | L291H4    | Mouse IgG1<br>kappa | 359414                                            |
|                | CD4              | Krome<br>Orange | 13B8.2    | Mouse IgG1          | A96417                                            |

**Supplemental Table S3.** Patient characteristics

| Patient | Sex | Age at diagnosis | Baseline CRP (Ref.: 0-0.5 mg/dl) | Brain metastases at diagnosis | Distant metastases other than brain at diagnosis | Irradiation during treatment with ICT or CPI maintenance |
|---------|-----|------------------|----------------------------------|-------------------------------|--------------------------------------------------|----------------------------------------------------------|
| 1       | m   | 67               | 1.2                              | no                            | LYMPH, PUL                                       | Prophylactic whole brain                                 |
| 2       | w   | 79               | 2                                | no                            | OSS                                              | Prophylactic whole brain                                 |
| 3       | w   | 66               | normal                           | no                            | HEP, ADR, PUL                                    | no                                                       |
| 4       | w   | 80               | normal                           | no                            | PLE, LYMPH, OSS, HEP                             | no                                                       |
| 5       | w   | 81               | normal                           | no                            | LYMPH, PLE                                       | no                                                       |
| 6       | m   | 80               | 3.4                              | Yes (1)                       | LYMPH, PLE, ADR, OSS                             | Irradiation of brain and bone metastases                 |
| 7       | w   | 60               | normal                           | no                            | PUL, LYMPH                                       | Prophylactic whole brain                                 |
| 8       | w   | 50               | normal                           | no                            | HEP, ADR                                         | no                                                       |
| 9       | m   | 70               | normal                           | no                            | PLE, LYMPH                                       | no                                                       |
| 10      | m   | 72               | 11.5                             | no                            | PUL, LYMPH, HEP, PLE, OSS, OTH                   | Irradiation of primary lung tumor                        |
| 11      | m   | 76               | normal                           | no                            | LYMPH, PLE                                       | Prophylactic whole brain                                 |
| 12      | w   | 44               | 2.2                              | no                            | PLE, LYMPH                                       | Prophylactic whole brain                                 |
| 13      | w   | 64               | 1.4                              | Yes (3)                       | PUL                                              | Radiation of brain metastases                            |
| 14      | m   | 64               | normal                           | no                            | LYMPH, HEP, OSS                                  | no                                                       |
| 15      | w   | 71               | normal                           | no                            | LYMPH, PUL, OSS                                  | no                                                       |
| 16      | m   | 78               | 7.5                              | no                            | LYMPH, HEP, OTH                                  | no                                                       |
| 17      | m   | 74               | 1.4                              | no                            | LYMPH, HEP                                       | Prophylactic whole brain                                 |
| 18      | m   | 64               | normal                           | no                            | PUL, OSS                                         | no                                                       |
| 19      | m   | 79               | normal                           | no                            | PLE, LYMPH                                       | no                                                       |
| 20      | w   | 71               | normal                           | Yes (multiple)                | PLE                                              | Whole brain radiation                                    |
| 21      | m   | 70               | 2.2                              | no                            | LYMPH, PLE, OSS                                  | no                                                       |
| 22      | w   | 83               | normal                           | no                            | PUL, PLE, LYMPH                                  | no                                                       |
| 23      | m   | 74               | 17.9                             | no                            | LYMPH, ADR, PER, OTH                             | no                                                       |
| 24      | m   | 69               | 1.6                              | no                            | PUL, LYMPH, HEP, OSS                             | no                                                       |
| 25      | m   | 62               | 9.7                              | no                            | PUL, HEP, ADR, OTH                               | no                                                       |
| 26      | m   | 69               | normal                           | no                            | PUL, LYMPH, HEP                                  | no                                                       |
| 27      | m   | 67               | normal                           | Yes (3)                       | PUL, ADR                                         | no                                                       |

|    |   |    |        |         |                           |                                          |
|----|---|----|--------|---------|---------------------------|------------------------------------------|
| 28 | m | 67 | normal | no      | PUL, LYMPH, HEP           | no                                       |
| 29 | w | 64 | normal | no      | PUL, LYMPH                | no                                       |
| 30 | m | 82 | 11.4   | no      | PUL, HEP, OSS             | Irradiatio of bone metastasis            |
| 31 | m | 59 | 2.0    | Yes (3) | PUL, LYMPH, HEP, OSS, OTH | Irradiation of brain and bone metastases |
| 32 | w | 69 | 1.3    | no      | LYMPH, PLE, PUL, OTH      | no                                       |

**Supplemental Table S4.** Impact of gender, small cell lung cancer (SCLC), and increasing age (per 10 years) on total count of lymphocytes and their subsets estimated as multiplicative factor (= coefficient B) in a multivariable model.

|                                 | Variables        | Coefficients B (95% CI) | p       |
|---------------------------------|------------------|-------------------------|---------|
| <b>Total Lymphocytes</b>        | gender           | 1.216 (1.045-1.415)     | 0.012   |
|                                 | Age ( /10 years) | 0.914 (0.986-0.996)     | 0.001   |
|                                 | SCLC             | 0.930 (0.748-1.154)     | 0.505   |
| <b>Total T cells (CD3+)</b>     | gender           | 1.397 (1.143-1.708)     | 0.001   |
|                                 | Age ( /10 years) | 0.870 (0.979-0.993)     | < 0.001 |
|                                 | SCLC             | 1.145 (0.859-1.526)     | 0.352   |
| <b>Cytotoxic T cells (CD8+)</b> | gender           | 1.258 (0.969-1.634)     | 0.084   |
|                                 | Age ( /10 years) | 0.833 (0.973-0.991)     | < 0.001 |
|                                 | SCLC             | 1.069 (0.736-1.553)     | 0.723   |
| <b>CD8+ naive</b>               | gender           | 1.277 (0.964-1.691)     | 0.088   |
|                                 | Age ( /10 years) | 0.741 (0.961-0.980)     | < 0.001 |
|                                 | SCLC             | 1.086 (0.727-1.623)     | 0.685   |
| <b>CD8+ CM</b>                  | gender           | 1.456 (1.030-2.059)     | 0.034   |
|                                 | Age ( /10 years) | 0.944 (0.982-1.006)     | 0.346   |
|                                 | SCLC             | 1.099 (0.670-1.804)     | 0.706   |
| <b>CD8+ EM</b>                  | gender           | 1.170 (0.817-1.675)     | 0.388   |
|                                 | Age ( /10 years) | 0.843 (0.971-0.996)     | 0.008   |
|                                 | SCLC             | 0.865 (0.518-1.446)     | 0.577   |
| <b>CD8+ EMRA</b>                | gender           | 1.234 (0.856-1.779)     | 0.257   |
|                                 | Age ( /10 years) | 1.011 (0.988-1.014)     | 0.871   |
|                                 | SCLC             | 0.827 (0.490-1.395)     | 0.472   |
| <b>CD8+ TE</b>                  | gender           | 1.217 (0.723-2.049)     | 0.456   |
|                                 | Age ( /10 years) | 0.970 (0.979-1.015)     | 0.738   |
|                                 | SCLC             | 0.997 (0.473-2.100)     | 0.994   |

|                              |                  |                     |         |
|------------------------------|------------------|---------------------|---------|
| <b>CD8+ TSCM</b>             | gender           | 0.994 (0.669-1.477) | 0.976   |
|                              | Age ( /10 years) | 0.804 (0.965-0.992) | 0.002   |
|                              | SCLC             | 0.805 (0.454-1.425) | 0.452   |
| <b>CD8+ early</b>            | gender           | 1.185 (0.926-1.516) | 0.176   |
|                              | Age ( /10 years) | 0.790 (0.968-0.985) | < 0.001 |
|                              | SCLC             | 0.820 (0.575-1.169) | 0.270   |
| <b>CD8+ intermediate</b>     | gender           | 1.519 (1.083-2.130) | 0.016   |
|                              | Age ( /10 years) | 0.859 (0.973-0.997) | 0.012   |
|                              | SCLC             | 0.702 (0.432-1.142) | 0.152   |
| <b>CD8+ late</b>             | gender           | 1.316 (0.622-2.782) | 0.469   |
|                              | Age ( /10 years) | 0.931 (0.967-1.019) | 0.588   |
|                              | SCLC             | 1.576 (0.537-4.623) | 0.404   |
| <b>CD8+ high exhausted</b>   | gender           | 1.218 (0.847-1.753) | 0.285   |
|                              | Age ( /10 years) | 0.864 (0.973-0.998) | 0.023   |
|                              | SCLC             | 1.097 (0.592-1.677) | 0.990   |
| <b>CD8+ low exhausted</b>    | gender           | 1.308 (0.992-1.725) | 0.057   |
|                              | Age ( /10 years) | 0.935 (0.984-1.003) | 0.175   |
|                              | SCLC             | 0.864 (0.581-1.284) | 0.466   |
| <b>CD8+ HLA-DR</b>           | gender           | 1.297 (0.933-1.802) | 0.120   |
|                              | Age ( /10 years) | 1.056 (0.994-1.017) | 0.349   |
|                              | SCLC             | 1.071 (0.668-1.717) | 0.773   |
| <b>CD69+ CD8+</b>            | gender           | 1.172 (0.899-1.530) | 0.238   |
|                              | Age ( /10 years) | 0.904 (0.981-0.999) | 0.034   |
|                              | SCLC             | 0.727 (0.497-1.065) | 0.101   |
| <b>Naive Treg CD8+</b>       | gender           | 0.985 (0.581-1.671) | 0.955   |
|                              | Age ( /10 years) | 1.078 (0.989-1.026) | 0.421   |
|                              | SCLC             | 1.190 (0.558-2.538) | 0.651   |
| <b>Memory Treg CD8+</b>      | gender           | 0.763 (0.504-1.155) | 0.199   |
|                              | Age ( /10 years) | 1.148 (0.999-1.029) | 0.061   |
|                              | SCLC             | 1.084 (0.598-1.966) | 0.788   |
| <b>Treg CD8+ CD127 low</b>   | gender           | 0.899 (0.664-1.217) | 0.488   |
|                              | Age ( /10 years) | 1.099 (0.999-1.020) | 0.079   |
|                              | SCLC             | 1.189 (0.770-1.835) | 0.432   |
| <b>T helper cells (CD4+)</b> | gender           | 1.465 (1.186-1.810) | 0.001   |
|                              | Age ( /10 years) | 0.884 (0.980-0.995) | 0.001   |
|                              | SCLC             | 1.172 (0.866-1.585) | 0.302   |
| <b>CD4+ naive</b>            | gender           | 1.584 (1.197-2.097) | 0.002   |
|                              | Age ( /10 years) | 0.840 (0.973-0.992) | 0.001   |
|                              | SCLC             | 1.254 (0.840-1.873) | 0.264   |
| <b>CD4+ CM</b>               | gender           | 1.549 (1.189-2.019) | 0.001   |
|                              | Age ( /10 years) | 0.905 (0.981-0.999) | 0.035   |
|                              | SCLC             | 1.182 (0.809-1.727) | 0.383   |

|                            |                  |                      |         |
|----------------------------|------------------|----------------------|---------|
| <b>CD4+ EM</b>             | gender           | 1.370 (1.037-1.809)  | 0.027   |
|                            | Age ( /10 years) | 0.866 (0.976-0.995)  | 0.004   |
|                            | SCLC             | 1.042 (0.700-1.550)  | 0.839   |
| <b>CD4+ EMRA</b>           | gender           | 1.354 (0.897-2.044)  | 0.148   |
|                            | Age ( /10 years) | 0.992 (0.985-1.014)  | 0.913   |
|                            | SCLC             | 1.431 (0.794-2.579)  | 0.231   |
| <b>CD4+ TE</b>             | gender           | 1.271 (0.763-2.118)  | 0.354   |
|                            | Age ( /10 years) | 1.051 (0.987-1.023)  | 0.585   |
|                            | SCLC             | 0.808 (0.389-1.676)  | 0.563   |
| <b>CD4+ TSCM</b>           | gender           | 1.139 (0.795-1.632)  | 0.474   |
|                            | Age ( /10 years) | 1.046 (0.992-1.017)  | 0.478   |
|                            | SCLC             | 0.736 (0.438-1.237)  | 0.245   |
| <b>CD4+ early</b>          | gender           | 1.530 (1.220-1.919)  | < 0.001 |
|                            | Age ( /10 years) | 0.871 (0.979-0.994)  | 0.001   |
|                            | SCLC             | 1.167 (0.843-1.616)  | 0.349   |
| <b>CD4+ intermediate</b>   | gender           | 1.187 (0.628-2.242)  | 0.594   |
|                            | Age ( /10 years) | 0.829 (0.960-1.003)  | 0.096   |
|                            | SCLC             | 1.944 (0.779-4.849)  | 0.152   |
| <b>CD4 late</b>            | gender           | 1.452 (0.474-4.450)  | 0.510   |
|                            | Age ( /10 years) | 1.136 (0.974-1.053)  | 0.520   |
|                            | SCLC             | 2.143 (0.429-10.712) | 0.350   |
| <b>CD4+ high exhausted</b> | gender           | 1.397 (1.069-1.827)  | 0.015   |
|                            | Age ( /10 years) | 0.992 (0.990-1.009)  | 0.871   |
|                            | SCLC             | 0.965 (0.658-1.415)  | 0.854   |
| <b>CD4+ low exhausted</b>  | gender           | 1.336 (1.087-1.641)  | 0.006   |
|                            | Age ( /10 years) | 0.923 (0.985-0.999)  | 0.030   |
|                            | SCLC             | 0.979 (0.730-1.315)  | 0.888   |
| <b>CD4+ HLA-DR</b>         | gender           | 1.185 (0.941-1.493)  | 0.148   |
|                            | Age ( /10 years) | 1.089 (1.000-1.017)  | 0.039   |
|                            | SCLC             | 0.968 (0.695-1.348)  | 0.846   |
| <b>Naive Treg CD4+</b>     | gender           | 1.334 (0.963-1.850)  | 0.083   |
|                            | Age ( /10 years) | 0.794 (0.966-0.988)  | < 0.001 |
|                            | SCLC             | 0.902 (0.565-1.441)  | 0.663   |
| <b>Memory Treg CD4+</b>    | gender           | 1.334 (0.963-1.850)  | 0.083   |
|                            | Age ( /10 years) | 0.794 (0.966-0.988)  | < 0.001 |
|                            | SCLC             | 0.902 (0.565-1.441)  | 0.663   |
| <b>Treg CD4+ CD127 low</b> | gender           | 1.227 (0.987-1.525)  | 0.065   |
|                            | Age ( /10 years) | 0.901 (0.982-0.997)  | 0.008   |
|                            | SCLC             | 1.094 (0.801-1.495)  | 0.567   |
| <b>CD69+ CD4+</b>          | gender           | 1.331 (1.043-1.698)  | 0.022   |
|                            | Age ( /10 years) | 0.905 (0.982-0.999)  | 0.022   |
|                            | SCLC             | 1.135 (0.800-1.611)  | 0.474   |

|                                                  |                  |                     |         |
|--------------------------------------------------|------------------|---------------------|---------|
| <b>CD4+ CD8+</b>                                 | gender           | 1.546 (1.057-2.263) | 0.025   |
|                                                  | Age ( /10 years) | 1.039 (0.991-1.017) | 0.569   |
|                                                  | SCLC             | 1.316 (0.764-2.268) | 0.320   |
| <b>Th 1</b>                                      | gender           | 1.235 (0.958-1.592) | 0.102   |
|                                                  | Age ( /10 years) | 0.996 (0.991-1.008) | 0.925   |
|                                                  | SCLC             | 0.615 (0.427-0.886) | 0.010   |
| <b>Th 2</b>                                      | gender           | 1.498 (1.181-1.899) | 0.001   |
|                                                  | Age ( /10 years) | 0.917 (0.983-1.000) | 0.040   |
|                                                  | SCLC             | 1.131 (0.803-1.591) | 0.478   |
| <b>Th 17</b>                                     | gender           | 1.445 (1.111-1.880) | 0.007   |
|                                                  | Age ( /10 years) | 0.903 (0.981-0.999) | 0.030   |
|                                                  | SCLC             | 1.371 (0.939-2.002) | 0.101   |
| <b>NK like T cells</b>                           | gender           | 1.439 (0.960-2.158) | 0.077   |
|                                                  | Age ( /10 years) | 0.848 (0.970-0.998) | 0.023   |
|                                                  | SCLC             | 1.181 (0.660-2.112) | 0.572   |
| <b>Total B cells (CD19+)</b>                     | gender           | 1.178 (0.926-1.500) | 0.180   |
|                                                  | Age ( /10 years) | 0.936 (0.985-1.002) | 0.123   |
|                                                  | SCLC             | 0.653 (0.462-0.921) | 0.016   |
| <b>Naïve B cells</b>                             | gender           | 1.174 (0.832-1.655) | 0.357   |
|                                                  | Age ( /10 years) | 0.958 (0.984-1.008) | 0.483   |
|                                                  | SCLC             | 0.616 (0.377-1.006) | 0.053   |
| <b>Non-class<br/>switched memory<br/>B cells</b> | gender           | 1.956 (1.198-3.193) | 0.008   |
|                                                  | Age ( /10 years) | 0.954 (0.978-1.012) | 0.584   |
|                                                  | SCLC             | 0.278 (0.138-0.561) | 0.001   |
| <b>Class switched<br/>memory B cells</b>         | gender           | 1.361 (1.062-1.744) | 0.016   |
|                                                  | Age ( /10 years) | 0.867 (0.977-0.994) | 0.002   |
|                                                  | SCLC             | 0.887 (0.622-1.265) | 0.505   |
| <b>Transitional B<br/>cells</b>                  | gender           | 0.750 (0.417-1.348) | 0.332   |
|                                                  | Age ( /10 years) | 0.953 (0.975-1.016) | 0.643   |
|                                                  | SCLC             | 0.162 (0.070-0.375) | < 0.001 |
| <b>Natural killer cells</b>                      | gender           | 0.905 (0.740-1.107) | 0.328   |
|                                                  | Age ( /10 years) | 1.033 (0.996-1.010) | 0.359   |
|                                                  | SCLC             | 0.580 (0.435-0.774) | < 0.001 |
| <b>CD56+ CD16+</b>                               | gender           | 0.899 (0.712-1.136) | 0.370   |
|                                                  | Age ( /10 years) | 1.020 (0.994-1.010) | 0.635   |
|                                                  | SCLC             | 0.616 (0.441-0.860) | 0.005   |
| <b>CD56bright/CD16dim</b>                        | gender           | 0.887 (0.705-1.115) | 0.301   |
|                                                  | Age ( /10 years) | 0.976 (0.990-1.006) | 0.546   |
|                                                  | SCLC             | 0.533 (0.384-0.739) | < 0.001 |
| <b>CD56dim/CD16bright</b>                        | gender           | 0.882 (0.661-1.177) | 0.391   |
|                                                  | Age ( /10 years) | 1.110 (1.000-1.021) | 0.043   |
|                                                  | SCLC             | 0.407 (0.270-0.615) | < 0.001 |



Abbreviations: CI: confidence interval, CM: central memory, EM: effector memory, EMRA: effector memory RA+, TE: terminal effector, TSCM: stem cell-like memory T, Treg, regulatory T, Th: T helper, NK: Natural Killer
